# Supplementary material for: An Experimental Approach to Address the Functional Relationship between Antioxidant Enzymes and Mitochondrial Respiratory Complexes
Source: MDPI journal article supplement (doi:10.3390/mps6020032), 2023-03-24
Supplement: s1 [file s1]

# **An Experimental Approach to Address the Functional Relationship between Antioxidant Enzymes and Mitochondrial Respiratory Complexes**

**Daniela Mendes <sup>1</sup>, Ana Maria Silva <sup>2</sup>, Maria Manuel Oliveira <sup>3</sup>, Paula B. Andrade <sup>1</sup> and Romeu A. Videira <sup>1,\*</sup>**

<sup>1</sup> REQUIMTE/LAQV, Laboratory of Pharmacognosy, Department of Chemistry, Faculty of Pharmacy, University of Porto, Rua de Jorge Viterbo Ferreira, n° 228, 4050-313 Porto, Portugal

<sup>2</sup> Department of Life Sciences, University of Coimbra, Calçada Martim de Freitas, 3000-456 Coimbra, Portugal

<sup>3</sup> Chemistry Center—Vila Real (CQ-VR), Chemistry Department, School of Life and Environmental Sciences, University of Trás-os-Montes e Alto Douro, UTAD, 5001-801 Vila Real, Portugal

\* Correspondence: [rvideira@ff.up.pt](mailto:rvideira@ff.up.pt)

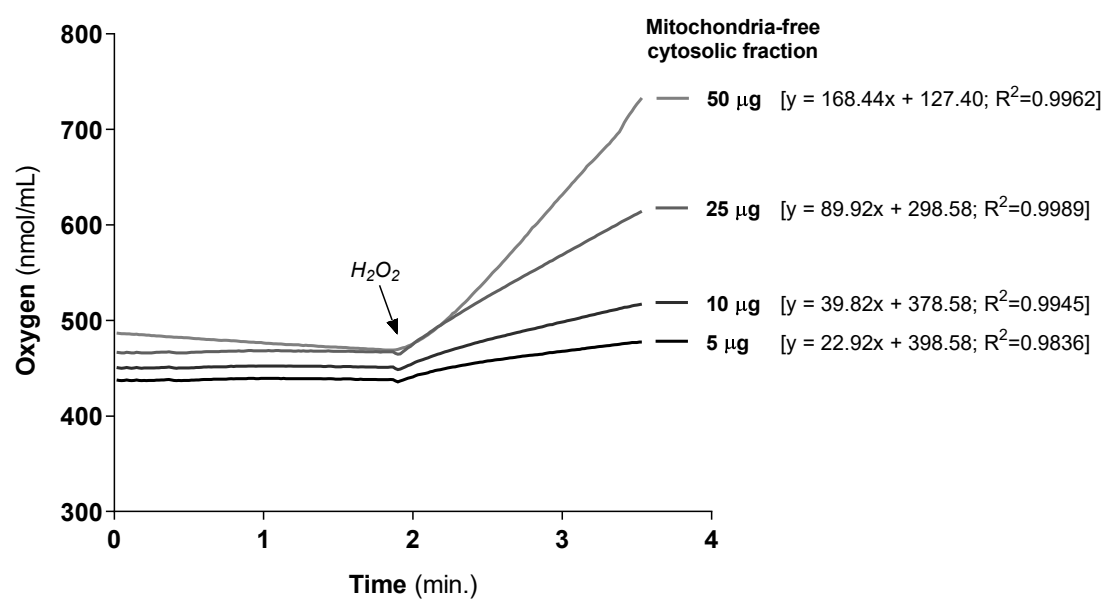

**Figure S1** – Oxygen production in nmol/mL for different concentrations of mitochondria-free cytosolic fraction (5, 10, 25 and 50µg) with the same  $H_2O_2$  concentration.
